# Supplementary material for: Omega-6:Omega-3 Fatty Acid Ratio and Total Fat Content of the Maternal Diet Alter Offspring Growth and Fat Deposition in the Rat
Source: PubMed Central journal article supplement (PMC7551768; doi:10.3390/nu12092505), 2020-08-19
Supplement: nutrients-12-02505-s001.pdf [file nutrients-12-02505-s001.pdf]

1 **Supplementary Table 1.** Offspring organ and tissue weights at 4 and 8 weeks of age.

| Experimental Group      | Male                      |                           |                           |                           | Female                   |                          |                          |                          |
|-------------------------|---------------------------|---------------------------|---------------------------|---------------------------|--------------------------|--------------------------|--------------------------|--------------------------|
|                         | High LA<br>(18% Fat)      | High LA<br>(36% Fat)      | Low LA<br>(18% Fat)       | Low LA<br>(36% Fat)       | High LA<br>(18% Fat)     | High LA<br>(36% Fat)     | Low LA<br>(18% Fat)      | Low LA<br>(36% Fat)      |
| <b>4 Week Offspring</b> |                           |                           |                           |                           |                          |                          |                          |                          |
| Heart (g)               | 0.54 ± 0.03 <sup>a</sup>  | 0.48 ± 0.01 <sup>b</sup>  | 0.54 ± 0.03 <sup>a</sup>  | 0.41 ± 0.03 <sup>b</sup>  | 0.51 ± 0.03 <sup>a</sup> | 0.44 ± 0.02 <sup>b</sup> | 0.51 ± 0.03 <sup>a</sup> | 0.41 ± 0.02 <sup>b</sup> |
| Lungs (g)               | 1.16 ± 0.04               | 0.98 ± 0.09               | 1.09 ± 0.07               | 1.04 ± 0.07               | 1.32 ± 0.15 <sup>a</sup> | 1.01 ± 0.07 <sup>b</sup> | 1.20 ± 0.12 <sup>a</sup> | 0.90 ± 0.05 <sup>b</sup> |
| Kidney (g)              | 1.21 ± 0.07 <sup>a</sup>  | 1.03 ± 0.03 <sup>b</sup>  | 1.18 ± 0.04 <sup>a</sup>  | 0.86 ± 0.05 <sup>b</sup>  | 1.12 ± 0.05 <sup>a</sup> | 0.89 ± 0.04 <sup>b</sup> | 1.12 ± 0.05 <sup>a</sup> | 0.81 ± 0.04 <sup>b</sup> |
| Liver (g)               | 5.68 ± 0.43 <sup>a</sup>  | 4.52 ± 0.22 <sup>b</sup>  | 5.43 ± 0.27 <sup>a</sup>  | 3.81 ± 0.25 <sup>b</sup>  | 4.74 ± 0.33 <sup>a</sup> | 3.82 ± 0.20 <sup>b</sup> | 4.77 ± 0.16 <sup>a</sup> | 3.55 ± 0.22 <sup>b</sup> |
| Gonadal fat (g)*        | 0.55 ± 0.06               | 0.47 ± 0.04               | 0.60 ± 0.04               | 0.32 ± 0.04               | 0.59 ± 0.08              | 0.55 ± 0.07              | 0.79 ± 0.05              | 0.42 ± 0.05              |
| Retroperitoneal fat (g) | 0.66 ± 0.09 <sup>a</sup>  | 0.48 ± 0.05 <sup>b</sup>  | 0.56 ± 0.03 <sup>a</sup>  | 0.40 ± 0.05 <sup>b</sup>  | 0.41 ± 0.08 <sup>a</sup> | 0.28 ± 0.03 <sup>b</sup> | 0.42 ± 0.03 <sup>a</sup> | 0.27 ± 0.03 <sup>b</sup> |
| <b>8 Week Offspring</b> |                           |                           |                           |                           |                          |                          |                          |                          |
| Brain (g)               | 1.91 ± 0.05 <sup>a</sup>  | 1.69 ± 0.05 <sup>b</sup>  | 1.87 ± 0.02 <sup>a</sup>  | 1.72 ± 0.03 <sup>b</sup>  | 1.71 ± 0.05 <sup>a</sup> | 1.63 ± 0.05 <sup>b</sup> | 1.66 ± 0.04 <sup>a</sup> | 1.51 ± 0.04 <sup>b</sup> |
| Heart (g)               | 1.17 ± 0.04 <sup>a</sup>  | 1.09 ± 0.05 <sup>b</sup>  | 1.23 ± 0.04 <sup>a</sup>  | 1.14 ± 0.03 <sup>b</sup>  | 0.83 ± 0.04              | 0.79 ± 0.03              | 0.82 ± 0.04              | 0.76 ± 0.03              |
| Lungs (g)               | 2.09 ± 0.24               | 1.83 ± 0.14               | 2.11 ± 0.19               | 1.91 ± 0.16               | 1.15 ± 0.11              | 1.31 ± 0.06              | 1.27 ± 0.05              | 1.28 ± 0.08              |
| Kidney (g)              | 2.83 ± 0.20 <sup>a</sup>  | 2.47 ± 0.08 <sup>b</sup>  | 2.88 ± 0.08 <sup>a</sup>  | 2.66 ± 0.12 <sup>b</sup>  | 1.89 ± 0.10              | 1.70 ± 0.07              | 1.78 ± 0.06              | 1.67 ± 0.06              |
| Liver (g)               | 16.28 ± 0.46 <sup>a</sup> | 14.85 ± 0.75 <sup>b</sup> | 17.04 ± 0.79 <sup>a</sup> | 15.19 ± 0.44 <sup>b</sup> | 9.63 ± 0.61              | 9.06 ± 0.43              | 9.37 ± 0.35              | 8.70 ± 0.24              |
| Gonadal fat (g)         | 4.43 ± 0.40 <sup>a</sup>  | 3.73 ± 0.31 <sup>b</sup>  | 4.62 ± 0.38 <sup>a</sup>  | 3.62 ± 0.32 <sup>b</sup>  | 2.95 ± 0.32              | 2.83 ± 0.11              | 3.47 ± 0.27              | 3.01 ± 0.46              |
| Retroperitoneal fat (g) | 4.11 ± 0.30               | 3.88 ± 0.41               | 4.55 ± 0.40               | 3.52 ± 0.31               | 1.89 ± 0.26              | 1.89 ± 0.32              | 2.01 ± 0.21              | 1.40 ± 0.05              |

2 All values are mean ± SEM. A two-way ANOVA was used to analyse results with maternal dietary fatty acid ratio and maternal dietary fat content as factors, all comparisons  
 3 are made within sex groups. Different superscripts denote values which are significantly different ( $P < 0.05$ ). \* indicates a significant interaction effect of maternal dietary  
 4 fatty acid ratio and maternal fat content on gonadal fat weight in male and female offspring ( $P < 0.05$ ). n=6-9 per dietary group.

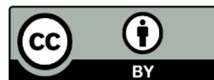

5 © 2020 by the authors. Submitted for possible open access publication under the terms  
 and conditions of the Creative Commons Attribution (CC BY) license  
 6 (<http://creativecommons.org/licenses/by/4.0/>).
